# Supplementary material
Source: Springer Nature journal article supplement (https://www.springermedizin.de/resource/supplementary/12885_2011_2833_MOESM4_ESM.pdf/9462106)

MMP-1 in tumours cells

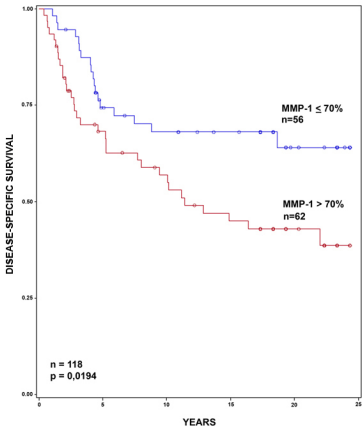

MMP-1 in cancer associated fibroblasts

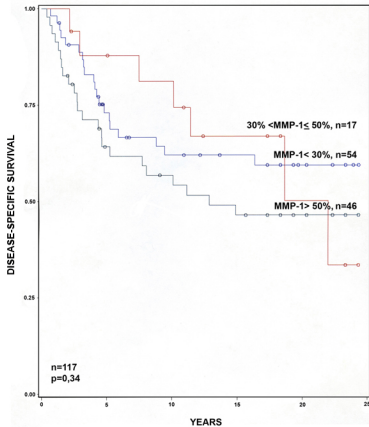

Supplement: MOESM4 [file 9462106]
